# Supplementary material
Source: PubMed Central journal article supplement (PMC6652750)
Supplement: IAI.00275-19-s0001.pdf [file IAI.00275-19-s0001.pdf]

S. Fig. 1

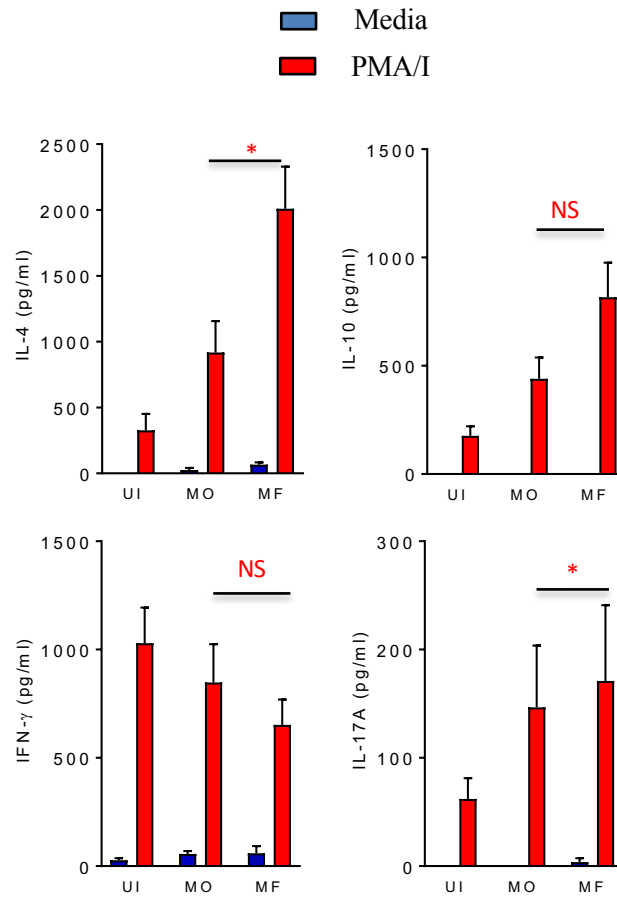

**Fig. S1. Cytokine production by mesenteric lymph node cells from *S. mansoni*-infected and uninfected mice.**

Cytokine production by mesenteric lymph nodes from UI and MO- or MF-infected mice, at 12 weeks post infection, after *in vitro* culture in media or stimulation with Phorbol-Myristate-Acetate/Ionomycin (PMA/I) for 72 hours. IL-4, IL-10, IFN- $\gamma$  and IL-17A were measured in supernatants by ELISA. Data are representative of >3 separate experiments and are presented as mean  $\pm$  SEM, from 3-4 mice per group. Statistical differences between all groups were determined by ANOVA and Tukey's multiple comparisons test. Statistical difference between MF and MO groups are shown: \*  $P < 0.05$ ; NS non-significant.
