# Supplementary material
Source: PubMed Central journal article supplement (PMC6652750)
Supplement: IAI.00275-19-s0002.pdf [file IAI.00275-19-s0002.pdf]

## S. Fig. 2

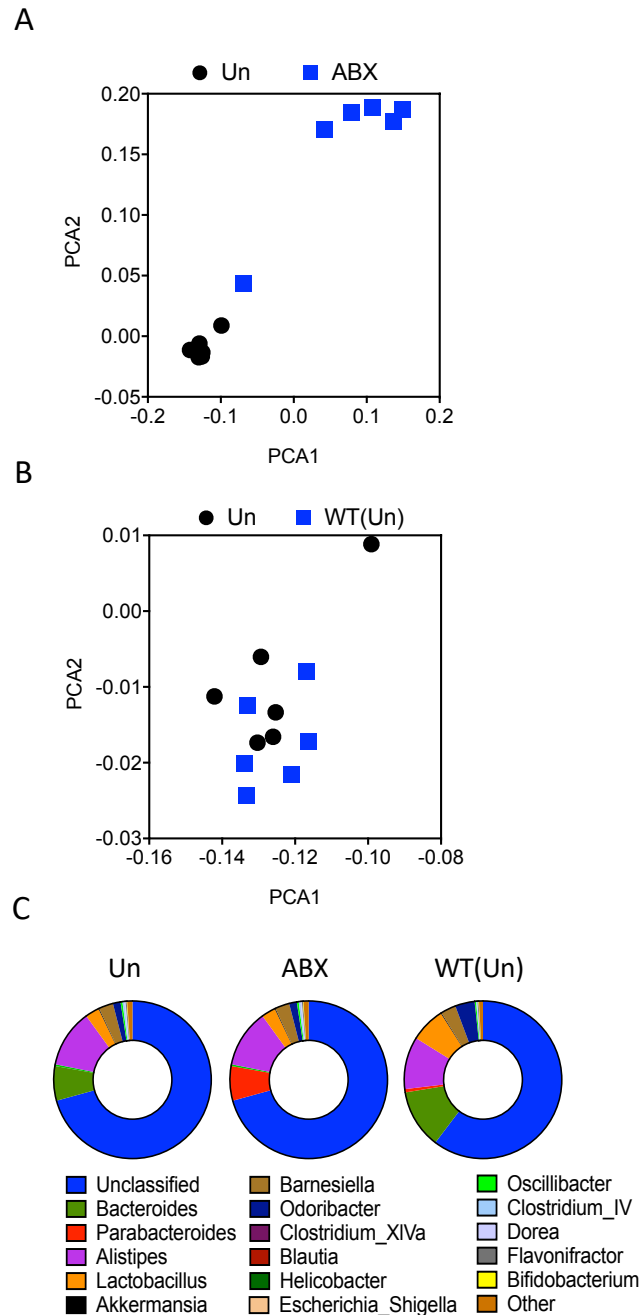

**Fig. S2. Effect of antibiotic treatment and co-housing on uninfected control mice.**

(A) Principal coordinate analysis (PCoA) of the faecal microbiota of control or antibiotic-treated (ABX) mice, 6 mice per group. (B) PCoA analysis of the faecal microbiota of control mice or antibiotic-treated mice cohoused with UI controls, 6 mice per group. (C) Pie charts showing the average relative abundances of the most common identified genera between the indicated groups, 6 mice per group.
