# Supplementary material
Source: PubMed Central journal article supplement (PMC6652750)
Supplement: IAI.00275-19-s0003.pdf [file IAI.00275-19-s0003.pdf]

## S. Fig. 3

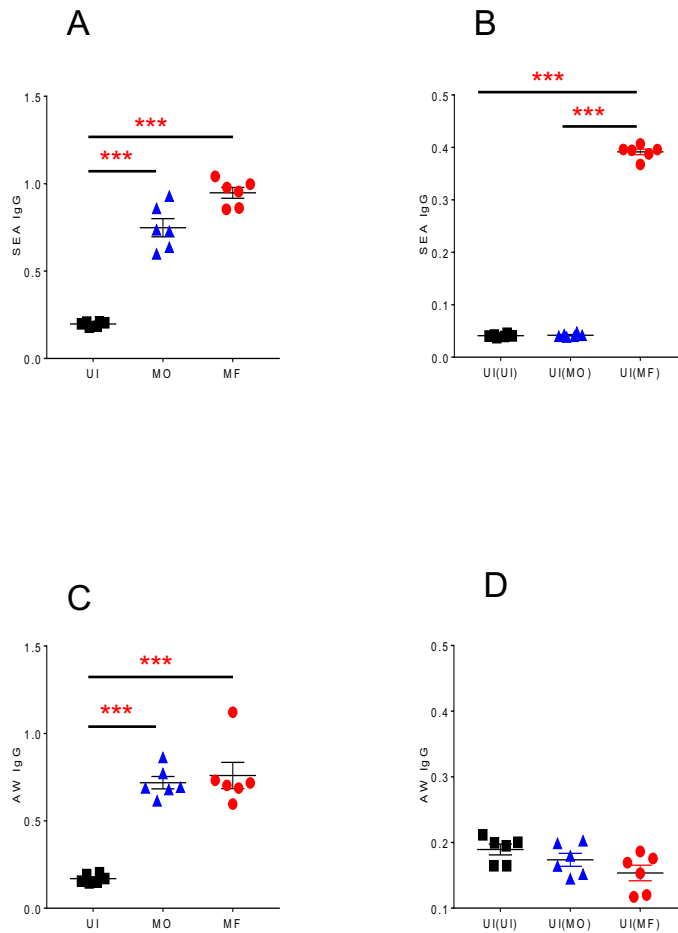

### Fig. S3. Detection of egg- but not worm-specific IgG in co-housed recipient mice.

(A) Detection of SEA-specific IgG in serum of male-only (MO), male-female (MF) infected mice and uninfected (UI) control mice, and (B) of ABX-treated uninfected (UI) mice co-housed with UI, MO- or MF-infected mice. (C) Detection of AW-specific IgG in serum of uninfected (UI) control mice, male-only (MO) and male-female (MF) infected mice, and (D) of ABX-treated uninfected (UI) mice co-housed with UI, MO or MF infected mice. Data are from two separate experiments and presented as mean  $\pm$  SEM, 6 mice per group. Statistical differences between all groups was determined using one-way ANOVA followed by Tukey's multi-comparisons test. \*\*\* $P < 0.001$ .
